# Supplementary material for: Risk Factors for Post-Stroke Pneumonia in a Patient Population with Subacute Stroke: A Retrospective Cohort Study
Source: MDPI journal article supplement (doi:10.3390/jcm12185835), 2023-09-08
Supplement: s1 [file s1]

### **Supplementary Material**

In 340 subacute stroke patients, a comparison of two groups of patients, with and without signs of pneumonia at admission, was performed using the *t*-test,  $\chi^2$  test, and Mann-Whitney's U test, with the significance level set at 5%.

There were significant differences in age, sex (male), duration from stroke onset to admission, m-FIM at admission, FOIS at admission, and Alb levels between the group with and without pneumonia on chest CT at admission. In addition, the group with signs of pneumonia was significantly more likely to be transported to an emergency hospital during the hospitalization period due to worsening condition.

**Table S1.** Comparison of the two groups of patients with and without signs of pneumonia at admission.

|                                                                | Signs of pneumonia<br>(n = 30) | No signs of pneumonia<br>(n = 310) | <i>p</i> -Value |
|----------------------------------------------------------------|--------------------------------|------------------------------------|-----------------|
| Age (y)                                                        | 76.3(6.82)                     | 70.0(14.6)                         | 0.021           |
| Sex (male) (%)                                                 | 23(76.7)                       | 178(52.4)                          | 0.041           |
| Duration from stroke onset to admission (days)                 | 43.4(32.0)                     | 33.2(19.8)                         | 0.012           |
| Length of stay (days)                                          | 89.3(56.2)                     | 83.4(51.5)                         | 0.552           |
| Functional Independence Measure motor at admission             | 27.9(15.6)                     | 42.3(21.4)                         | <0.001          |
| Functional Independence Measure cognitive at admission         | 17.7(8.06)                     | 20.7(8.79)                         | 0.062           |
| Stroke Impairment Assessment Set at admission                  | 12.8(9.63)                     | 15.7(8.76)                         | 0.085           |
| Functional Oral Intake Scale score at admission                | 4[1-5]                         | 5[5-7]                             | <0.001          |
| Body mass index at admission (kg/m <sup>2</sup> )              | 20.8(2.25)                     | 21.9(3.61)                         | 0.112           |
| White blood count at admission (°C)                            | 7555.6(2109.2)                 | 6781.2(2255.3)                     | 0.072           |
| C-reactive protein at admission (/μL)                          | 1.11(1.51)                     | 0.75(1.97)                         | 0.243           |
| Serum albumin at admission (mg/dl)                             | 3.56(0.41)                     | 3.85(0.46)                         | 0.001           |
| Transfer to acute care hospital due to worsening condition (%) | 9(30.0)                        | 44(12.9)                           | 0.023           |

Quantitative variables are summarized as mean (standard deviation; SD) and median [interquartile range; IQR, 25–75th percentiles] values.

Categorical variables are summarized as frequencies and percentages.
